# Supplementary material
Source: bioRxiv or medRxiv preprint supplement (https://medrxiv.org/highwire/filestream/97041/field_highwire_adjunct_files/2/2020.09.11.20187369-3.pdf)

**a** SuppFigure4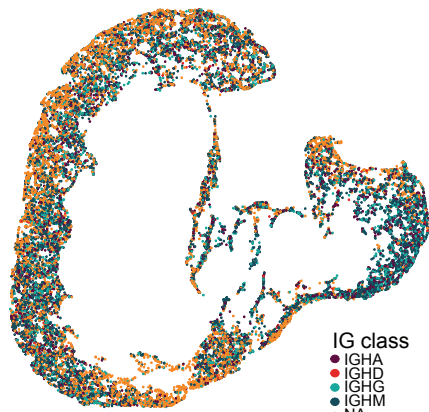**b**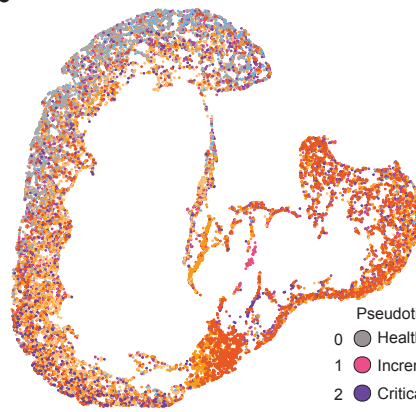**c**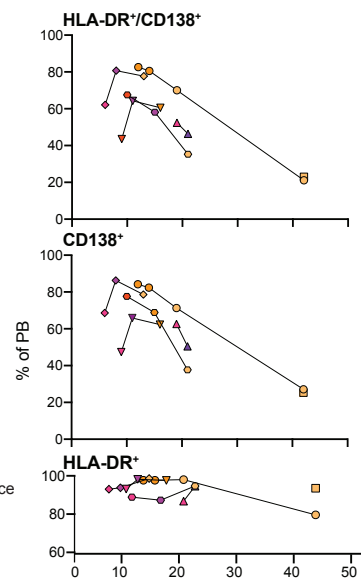**d**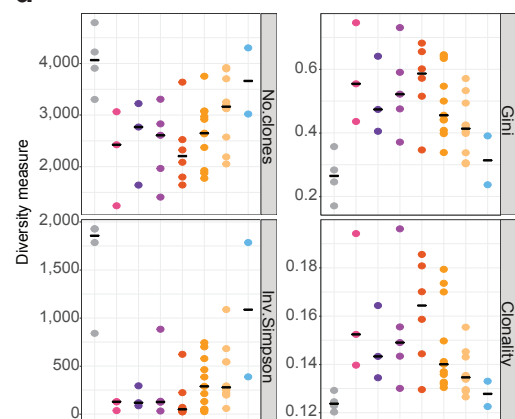**e**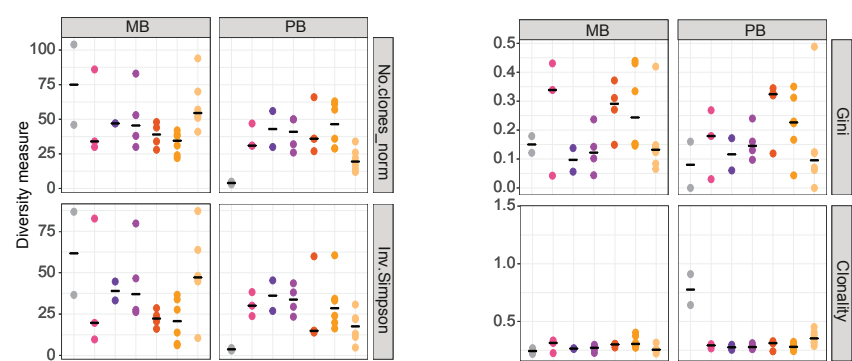**f**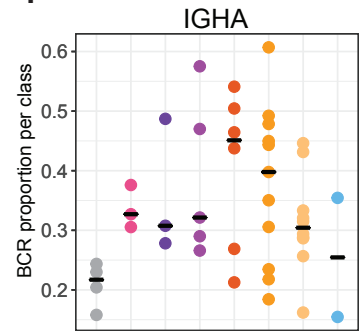**g**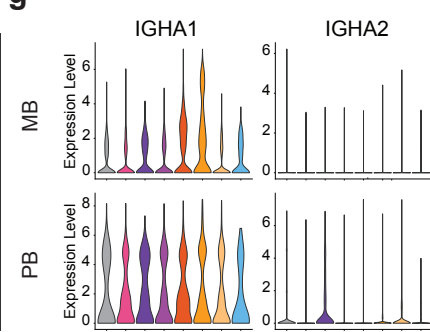**h**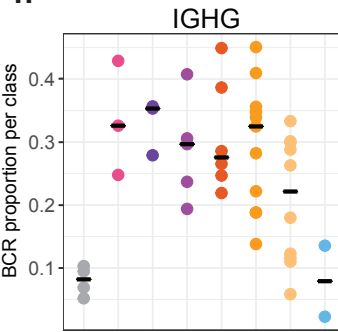**i**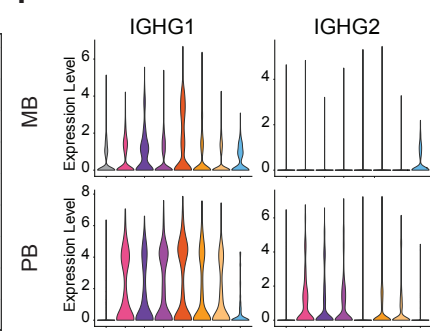**j**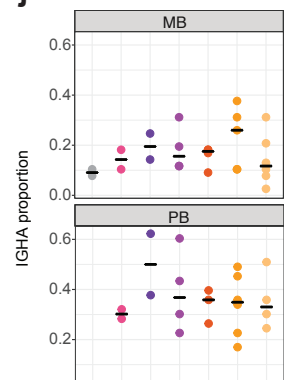**k**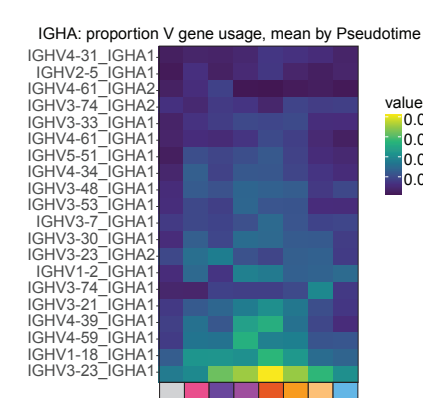**l**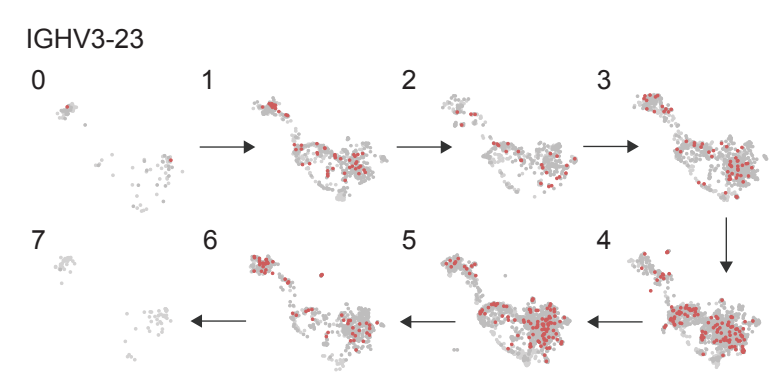**m**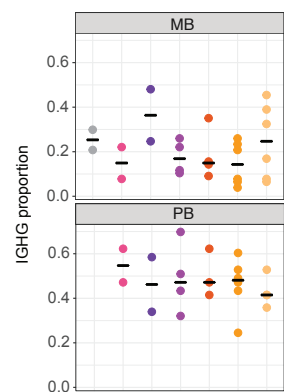**n**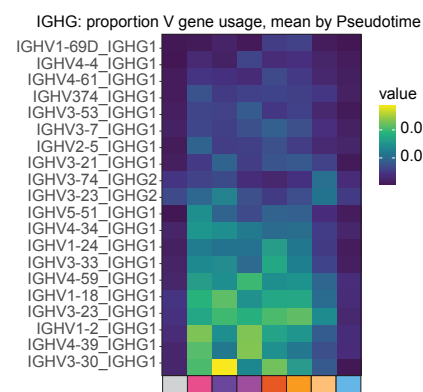**o**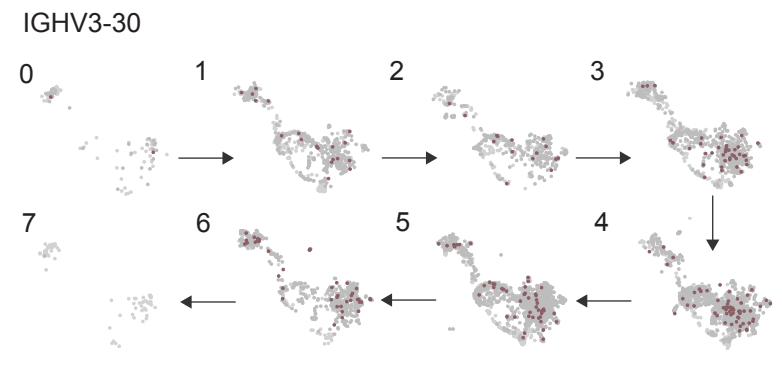

Supplement: Supplementary file [file 2020.09.11.20187369-3.pdf]
